# Supplementary material for: Mental health prevalence and predictors among university students in nine countries during the COVID-19 pandemic: a cross-national study
Source: PubMed Central journal article supplement (PMC8452732; doi:10.1038/s41598-021-97697-3), 2021-09-20
Supplement: 41598_2021_97697_MOESM1_ESM.pdf [file 41598_2021_97697_MOESM1_ESM.pdf]

Supplementary Information

## **Mental Health Prevalence and Predictors Among University Students in Nine Countries During the COVID-19 Pandemic: A Cross-National Study**

**Dominika Ochnik<sup>1</sup>, Aleksandra M. Rogowska<sup>2</sup>, Cezary Kuśnierz<sup>3</sup>, Monika Jakubiak<sup>4</sup>, Astrid Schütz<sup>5</sup>, Marco J. Held<sup>5\*</sup>, Ana Arzenšek<sup>6</sup>, Joy Benatov<sup>7</sup>, Rony Berger<sup>8,9</sup>, Elena V. Korchagina<sup>10</sup>, Iuliia Pavlova<sup>11</sup>, Ivana Blažková<sup>12</sup>, Imran Aslan<sup>13</sup>, Orhan Çınar<sup>14,15</sup>, Yonni Angel Cuero-Acosta<sup>16</sup>**

<sup>1</sup>University of Technology, Faculty of Medicine, Katowice, 40-555, Poland.

<sup>2</sup>University of Opole, Institute of Psychology, Opole, 45-052, Poland.

<sup>3</sup>Opole University of Technology, Faculty of Physical Education and Physiotherapy, Opole, 45-758, Poland.

<sup>4</sup>Maria Curie-Skłodowska University in Lublin, Faculty of Economics, Lublin, 20-031, Poland.

<sup>5</sup>University of Bamberg, Department of Psychology, Bamberg, 96047, Germany.

<sup>6</sup>University of Primorska, Faculty of Management, Koper, 6101, Slovenia.

<sup>7</sup>University of Haifa, Department of Special Education, Haifa, 3498838, Israel.

<sup>8</sup>The Center for Compassionate Mindful Education, Tel Aviv, 69106, Israel.

<sup>9</sup>Tel-Aviv University, Bob Shapell School of Social Work, Tel Aviv, 69978, Israel.

<sup>10</sup>Peter the Great St. Petersburg Polytechnic University, Institute of Industrial Management, Economics and Trade, St. Petersburg, 195251, Russia.

<sup>11</sup>Lviv State University of Physical Culture, Department of Theory and Methods of Physical Culture, Lviv, 79007, Ukraine.

<sup>12</sup>Mendel University in Brno, Department of Regional and Business Economics, Brno, 613 00, Czech Republic.

<sup>13</sup>Bingöl University, Health Management Department, Bingöl, 12000, Turkey.

<sup>14</sup>Ataturk University, Faculty of Economics and Administrative Sciences, Erzurum, 25240, Turkey.

<sup>15</sup>Ağrı İbrahim Çeçen University, Faculty of Economics and Administrative Sciences, Ağrı, 04000, Turkey.

<sup>16</sup> Universidad del Rosario, School of Management, Bogotá, PC 111711, Colombia.

\*marco.held@uni-bamberg.de

**Table S1.** Values and levels of the COVID-19 pandemic restrictions' stringency (Stringency) and socio-economic indexes: Gender Inequality Index (GII) and S&P Global Rating in the nine countries.

| Country  | Stringency<br>Range | GII   |      | S&P Rating | Stringency |     | GII  |     | S&P Rating |
|----------|---------------------|-------|------|------------|------------|-----|------|-----|------------|
|          |                     | 0-100 | 0-1  | AAA-D      | 0-1        | 0-1 | 0-1  | 0-2 |            |
| Poland   | 67.13               | .12   | A-   | 0          | low        | 0   | low  | 0   | low        |
| Slovenia | 47.91               | .07   | AA-  | 0          | low        | 0   | low  | 0   | low        |
| Czechia  | 41.67               | .14   | AA-  | 0          | low        | 1   | high | 0   | low        |
| Ukraine  | 82.64               | .29   | B    | 1          | high       | 1   | high | 2   | high       |
| Russia   | 74.54               | .25   | BBB- | 0          | low        | 1   | high | 1   | medium     |
| Germany  | 61.57               | .08   | AAA  | 1          | high       | 0   | low  | 0   | low        |
| Turkey   | 75.93               | .30   | B+   | 1          | high       | 1   | high | 2   | high       |
| Israel   | 75.00               | .10   | AA-  | 1          | high       | 0   | low  | 0   | low        |
| Colombia | 87.04               | .41   | BBB- | 1          | high       | 1   | high | 1   | medium     |

Note: S&P Global Rating index refers to credit risk estimation.

## Supplementary Note

### **The recruitment details of the university students from Poland, Slovenia, Czechia, Ukraine, Russia, Germany, Turkey, Israel, and Colombia**

The Polish sample consisted of 301 students recruited from Maria Curie-Skłodowska University (UMCS) in eastern Poland (n = 149, 48%) and from University of Opole in the south of Poland (n = 152, 51%). In Slovenia, all students were from University of Primorska in Koper (n = 209, 100%), in Czechia from Mendel University in Brno (n = 310, 100%), and in Ukraine from Lviv State University of Physical Culture (n = 310, 100%). Russian students were from universities located in Sankt Petersburg: Peter the Great St. Petersburg Polytechnic University (n = 155, 54%), HSE University (n = 90, 31%), and St. Petersburg State University of Economics and Finance (n = 42, 15%). The German sample was from University of Bamberg (n = 270, 100%) whereas the Israeli sample was from University of Haifa (n = 199, 100%). Turkish students were from eleven Turkish universities mostly located in eastern Turkey: Bingöl University, Bingöl (n = 148, 48%); Atatürk University, Erzurum (n = 110, 35%); Muğla Sıtkı Koçman University, Muğla (n = 35, 11%); Ağrı İbrahim Çeçen University, Ağrı (n = 6, 2%); Fırat University, Elazığ (n = 3, 0.8%); Kırıkkale University, Kırıkkale (n = 1, 0.3%); Adnan Menderes University, Aydın (n = 1, 0.3%); Başkent University, (n = 3, 1%); Boğaziçi University (n = 1, 0.3%), Dicle University, Diyarbakır (n = 1, 0.3%), and Istanbul University (n = 1, 0.3%). Colombian students (n = 155) were recruited from Bogota universities: Del Rosario University (n = 142, 92%) and El Bosque University (n = 13, 8%).
